# Supplementary material
Source: publisher figshare collection journal article supplement (https://diabetesjournals.figshare.com/articles/dataset/_/21513840)
Supplement: Supplementary file 1 [file 38429261]

**Supplementary Table 1. Variables-stratified, multivariable-adjusted analyses for the associations of SUA level with all-cause mortality in patients with diabetes from NHANES 1999-2018.**

| Subgroups             | Serum uric acid levels |                   |                   |                   |                   | <i>P interaction</i> |
|-----------------------|------------------------|-------------------|-------------------|-------------------|-------------------|----------------------|
|                       | Quintile 1             | Quintile 2        | Quintile 3        | Quintile 4        | Quintile 5        |                      |
| <b>Age, years</b>     |                        |                   |                   |                   |                   | 0.023                |
| ≤60                   | 1(ref)                 | 1.10 (0.63, 1.92) | 0.92 (0.50, 1.70) | 1.15 (0.66, 2.03) | 1.77 (1.05, 2.97) |                      |
| >60                   | 1(ref)                 | 1.02 (0.80, 1.31) | 1.05 (0.81, 1.35) | 0.83 (0.64, 1.07) | 1.14 (0.90, 1.44) |                      |
| <b>Sex groups</b>     |                        |                   |                   |                   |                   | 0.240                |
| Men                   | 1(ref)                 | 0.97 (0.67, 1.40) | 1.03 (0.77, 1.39) | 0.83 (0.60, 1.14) | 1.44 (1.05, 1.98) |                      |
| Women                 | 1(ref)                 | 1.12 (0.83, 1.51) | 1.03 (0.78, 1.37) | 1.04 (0.78, 1.40) | 1.11 (0.83, 1.50) |                      |
| <b>Race/ethnicity</b> |                        |                   |                   |                   |                   | 0.872                |
| Non-Hispanic white    | 1(ref)                 | 1.04 (0.79, 1.36) | 0.97 (0.73, 1.30) | 0.92 (0.69, 1.22) | 1.35 (1.01, 1.82) |                      |
| Non white             | 1(ref)                 | 1.04 (0.75, 1.44) | 1.13 (0.83, 1.54) | 1.03 (0.75, 1.41) | 1.20 (0.91, 1.59) |                      |

|                          |        |                   |                   |                   |                   |       |
|--------------------------|--------|-------------------|-------------------|-------------------|-------------------|-------|
| <b>Income groups</b>     |        |                   |                   |                   |                   | 0.188 |
| <1.31                    | 1(ref) | 0.95 (0.65, 1.40) | 1.03 (0.73, 1.46) | 0.87 (0.58, 1.29) | 1.16 (0.81, 1.67) |       |
| 1.31-3.50                | 1(ref) | 1.16 (0.81, 1.65) | 1.32 (0.95, 1.83) | 0.93 (0.65, 1.35) | 1.33 (0.92, 1.94) |       |
| >3.50                    | 1(ref) | 0.95 (0.50, 1.79) | 0.82 (0.43, 1.55) | 1.16 (0.62, 2.16) | 2.09 (1.04, 4.19) |       |
| <b>Educational level</b> |        |                   |                   |                   |                   | 0.947 |
| High school or less      | 1(ref) | 1.08 (0.84, 1.39) | 1.10 (0.88, 1.37) | 0.99 (0.78, 1.26) | 1.23 (0.95, 1.59) |       |
| College or above         | 1(ref) | 0.93 (0.58, 1.52) | 0.92 (0.57, 1.49) | 0.85 (0.54, 1.33) | 1.36 (0.88, 2.09) |       |
| <b>Smoking groups</b>    |        |                   |                   |                   |                   | 0.821 |
| Non-smoker               | 1(ref) | 1.03 (0.76, 1.40) | 1.01 (0.72, 1.43) | 0.84 (0.60, 1.18) | 1.38 (0.98, 1.96) |       |
| Current smoker           | 1(ref) | 1.10 (0.83, 1.45) | 1.04 (0.75, 1.43) | 0.99 (0.73, 1.33) | 1.21 (0.90, 1.63) |       |
| <b>Alcohol intake</b>    |        |                   |                   |                   |                   | 0.601 |
| None                     | 1(ref) | 1.07 (0.82, 1.38) | 1.07 (0.83, 1.37) | 0.98 (0.76, 1.28) | 1.26 (0.96, 1.65) |       |
| Drinking                 | 1(ref) | 0.97 (0.49, 1.93) | 0.79 (0.42, 1.49) | 0.84 (0.43, 1.63) | 1.42 (0.77, 2.62) |       |

|                                            |        |                   |                   |                   |                   |       |
|--------------------------------------------|--------|-------------------|-------------------|-------------------|-------------------|-------|
| <b>Physical activity groups</b>            |        |                   |                   |                   |                   | 0.011 |
| Inactive                                   | 1(ref) | 1.02 (0.81, 1.29) | 0.95 (0.75, 1.22) | 0.79 (0.60, 1.04) | 1.01 (0.78, 1.30) |       |
| Insufficient                               | 1(ref) | 0.98 (0.43, 2.20) | 1.08 (0.48, 2.42) | 0.84 (0.39, 1.84) | 1.31 (0.56, 3.07) |       |
| Active                                     | 1(ref) | 1.04 (0.68, 1.59) | 1.15 (0.72, 1.86) | 1.48 (0.99, 2.23) | 2.24 (1.33, 3.75) |       |
| <b>eGFR, ml/min per 1.73 m<sup>2</sup></b> |        |                   |                   |                   |                   | 0.242 |
| <60                                        | 1(ref) | 1.63 (0.96, 2.78) | 1.93 (1.19, 3.13) | 1.53 (0.99, 2.36) | 1.91 (1.22, 2.97) |       |
| 60-89                                      | 1(ref) | 1.02 (0.71, 1.46) | 0.90 (0.67, 1.22) | 0.79 (0.56, 1.10) | 1.41 (1.03, 1.92) |       |
| ≥90                                        | 1(ref) | 0.84 (0.56, 1.26) | 1.00 (0.63, 1.59) | 1.02 (0.65, 1.61) | 1.41 (0.88, 2.25) |       |
| <b>BMI, kg/m<sup>2</sup></b>               |        |                   |                   |                   |                   | 0.228 |
| <30                                        | 1(ref) | 1.06 (0.73, 1.54) | 1.12 (0.77, 1.61) | 0.95 (0.64, 1.41) | 1.43 (1.01, 2.02) |       |
| ≥30                                        | 1(ref) | 1.02 (0.75, 1.39) | 0.94 (0.71, 1.25) | 0.93 (0.70, 1.25) | 1.06 (0.76, 1.47) |       |

---

Values are weighted hazard ratio (95% confidence interval).

Model: adjusted for age, sex, race/ethnicity, education level, family income level, smoking status, alcohol intake, physical activity, TEI, and HEI-2015, BMI, hypertension, dyslipidemia, diabetes duration, HbA1c, allopurinol, oral hypoglycemic drugs, insulin therapy, albuminuria, eGFR, and baseline CVD, with excluding the stratifying factors.

**Supplementary Table 2. Variables-stratified, multivariable-adjusted analyses for the associations of SUA level with CVD mortality in patients with diabetes from NHANES 1999-2018.**

| Subgroups             | Serum uric acid levels |                   |                   |                   |                   | <i>P interaction</i> |
|-----------------------|------------------------|-------------------|-------------------|-------------------|-------------------|----------------------|
|                       | Quintile 1             | Quintile 2        | Quintile 3        | Quintile 4        | Quintile 5        |                      |
| <b>Age, years</b>     |                        |                   |                   |                   |                   | 0.717                |
| ≤60                   | 1(ref)                 | 1.22 (0.51, 2.93) | 0.73 (0.27, 1.97) | 0.59 (0.22, 1.58) | 1.73 (0.80, 3.72) |                      |
| >60                   | 1(ref)                 | 0.88 (0.57, 1.36) | 1.22 (0.81, 1.82) | 0.95 (0.63, 1.43) | 1.44 (0.97, 2.12) |                      |
| <b>Sex groups</b>     |                        |                   |                   |                   |                   | 0.616                |
| Men                   | 1(ref)                 | 0.98 (0.52, 1.85) | 1.17 (0.70, 1.94) | 0.82 (0.49, 1.38) | 1.51 (0.92, 2.47) |                      |
| Women                 | 1(ref)                 | 1.10 (0.66, 1.82) | 0.97 (0.62, 1.53) | 0.96 (0.61, 1.50) | 1.38 (0.88, 2.17) |                      |
| <b>Race/ethnicity</b> |                        |                   |                   |                   |                   | 0.604                |
| Non-Hispanic white    | 1(ref)                 | 1.09 (0.67, 1.75) | 1.07 (0.65, 1.74) | 0.99 (0.66, 1.50) | 1.65 (1.11, 2.44) |                      |
| Non white             | 1(ref)                 | 0.91 (0.55, 1.52) | 1.16 (0.73, 1.84) | 0.78 (0.48, 1.26) | 1.30 (0.83, 2.03) |                      |

|                              |        |                   |                   |                   |                   |       |
|------------------------------|--------|-------------------|-------------------|-------------------|-------------------|-------|
| <b>Income groups</b>         |        |                   |                   |                   |                   | 0.174 |
| <1.31                        | 1(ref) | 0.82 (0.44, 1.52) | 0.90 (0.55, 1.49) | 0.72 (0.40, 1.31) | 1.14 (0.70, 1.86) |       |
| 1.31-3.50                    | 1(ref) | 1.11 (0.59, 2.09) | 1.33 (0.75, 2.34) | 1.10 (0.64, 1.91) | 1.68 (0.97, 2.90) |       |
| >3.50                        | 1(ref) | 1.35 (0.56, 3.29) | 1.26 (0.45, 3.52) | 1.44 (0.68, 3.08) | 3.20 (1.21, 8.45) |       |
| <b>Educational level</b>     |        |                   |                   |                   |                   | 0.466 |
| High school or less          | 1(ref) | 1.08 (0.71, 1.65) | 1.26 (0.84, 1.9)  | 1.10 (0.74, 1.65) | 1.57 (1.04, 2.36) |       |
| College or above             | 1(ref) | 0.86 (0.41, 1.82) | 0.92 (0.37, 2.30) | 0.55 (0.25, 1.21) | 1.18 (0.52, 2.65) |       |
| <b>Smoking groups</b>        |        |                   |                   |                   |                   | 0.946 |
| Non-smoker                   | 1(ref) | 0.76 (0.48, 1.22) | 0.96 (0.62, 1.50) | 0.80 (0.46, 1.41) | 1.64 (1.00, 2.69) |       |
| Current smoker               | 1(ref) | 1.48 (0.85, 2.60) | 1.32 (0.80, 2.17) | 1.06 (0.70, 1.60) | 1.43 (0.89, 2.28) |       |
| <b>Alcohol intake groups</b> |        |                   |                   |                   |                   | 0.375 |
| None                         | 1(ref) | 1.24 (0.80, 1.94) | 1.24 (0.81, 1.91) | 0.96 (0.64, 1.45) | 1.48 (1.01, 2.17) |       |
| Drinking                     | 1(ref) | 0.36 (0.13, 1.00) | 0.70 (0.31, 1.62) | 0.75 (0.30, 1.84) | 1.62 (0.70, 3.76) |       |

|                                            |        |                   |                   |                   |                   |       |
|--------------------------------------------|--------|-------------------|-------------------|-------------------|-------------------|-------|
| <b>Physical activity groups</b>            |        |                   |                   |                   |                   | 0.506 |
| Inactive                                   | 1(ref) | 1.13 (0.73, 1.72) | 1.00 (0.65, 1.54) | 0.74 (0.48, 1.12) | 1.25 (0.83, 1.87) |       |
| Insufficient                               | 1(ref) | 0.44 (0.16, 1.20) | 0.60 (0.17, 2.17) | 0.79 (0.26, 2.40) | 0.38 (0.07, 2.07) |       |
| Active                                     | 1(ref) | 0.84 (0.42, 1.65) | 1.34 (0.70, 2.59) | 1.25 (0.68, 2.30) | 2.60 (1.35, 5.01) |       |
| <b>eGFR, ml/min per 1.73 m<sup>2</sup></b> |        |                   |                   |                   |                   | 0.889 |
| <60                                        | 1(ref) | 0.88 (0.35, 2.23) | 1.54 (0.70, 3.40) | 0.99 (0.47, 2.09) | 1.52 (0.72, 3.20) |       |
| 60-89                                      | 1(ref) | 1.14 (0.61, 2.16) | 1.02 (0.61, 1.69) | 0.96 (0.55, 1.69) | 1.75 (0.94, 3.23) |       |
| ≥90                                        | 1(ref) | 1.03 (0.48, 2.19) | 1.12 (0.49, 2.54) | 0.94 (0.39, 2.29) | 1.47 (0.69, 3.12) |       |
| <b>BMI, kg/m<sup>2</sup></b>               |        |                   |                   |                   |                   | 0.041 |
| <30                                        | 1(ref) | 1.17 (0.62, 2.20) | 1.49 (0.80, 2.76) | 1.22 (0.64, 2.33) | 1.85 (1.01, 3.39) |       |
| ≥30                                        | 1(ref) | 1.01 (0.61, 1.66) | 0.88 (0.56, 1.39) | 0.78 (0.47, 1.29) | 1.11 (0.66, 1.86) |       |

---

Values are weighted hazard ratio (95% confidence interval).

Model: adjusted for age, sex, race/ethnicity, education level, family income level, smoking status, alcohol intake, physical activity, TEI, and HEI-2015, BMI, hypertension, dyslipidemia, diabetes duration, HbA1c, allopurinol, oral hypoglycemic drugs, insulin therapy, albuminuria, eGFR, and baseline CVD, with excluding the stratifying factors.



**Supplementary Table 3. Multivariable-adjusted analyses for the associations of SUA level with all-cause and CVD mortality among diabetes from NHANES 1999-2018 after excluding the patients died within two years.**

|                            | Serum uric acid levels |                   |                   |                   |                   | Per 1 mg/ml<br>increment | <i>P trend</i> |
|----------------------------|------------------------|-------------------|-------------------|-------------------|-------------------|--------------------------|----------------|
|                            | Quintile 1             | Quintile 2        | Quintile 3        | Quintile 4        | Quintile 5        |                          |                |
| <b>All-cause mortality</b> |                        |                   |                   |                   |                   |                          |                |
| Model 1                    | 1(ref)                 | 0.96 (0.76, 1.21) | 0.99 (0.79, 1.23) | 0.95 (0.76, 1.19) | 1.42 (1.14, 1.77) | 1.12 (1.07, 1.17)        | <0.001         |
| Model 2                    | 1(ref)                 | 0.96 (0.76, 1.20) | 1.04 (0.84, 1.28) | 0.93 (0.75, 1.17) | 1.37 (1.09, 1.71) | 1.10 (1.04, 1.16)        | <0.001         |
| Model 3                    | 1(ref)                 | 1.06 (0.84, 1.34) | 1.07 (0.86, 1.33) | 0.98 (0.79, 1.23) | 1.30 (1.03, 1.63) | 1.07 (1.02, 1.13)        | 0.010          |
| <b>CVD mortality</b>       |                        |                   |                   |                   |                   |                          |                |
| Model 1                    | 1(ref)                 | 0.88 (0.59, 1.33) | 0.97 (0.68, 1.39) | 0.88 (0.60, 1.28) | 1.55 (1.10, 2.19) | 1.15 (1.06, 1.25)        | 0.001          |
| Model 2                    | 1(ref)                 | 0.90 (0.61, 1.34) | 1.05 (0.74, 1.49) | 0.88 (0.61, 1.28) | 1.51 (1.10, 2.08) | 1.13 (1.05, 1.22)        | 0.002          |
| Model 3                    | 1(ref)                 | 1.02 (0.70, 1.50) | 1.08 (0.74, 1.57) | 0.94 (0.66, 1.33) | 1.45 (1.04, 2.03) | 1.11 (1.02, 1.20)        | 0.015          |

Values are n or weighted hazard ratio (95% confidence interval).

**Model 1:** adjusted for age, sex, and race/ethnicity.

**Model 2:** model 1 + education level, family income level, smoking status, alcohol intake, physical activity, TEI, and HEI-2015.

**Model 3:** model 2 + BMI, hypertension, dyslipidemia, diabetes duration, HbA1c, allopurinol, oral hypoglycemic drugs, insulin therapy, albuminuria, eGFR, and baseline CVD.

**Supplementary Table 4. Multivariable-adjusted analyses for the associations of SUA level with all-cause and CVD mortality among diabetes from NHANES 1999-2018 after excluding the patients with allopurinol therapy, insulin therapy, or oral hypoglycemic drugs.**

|                                             | Serum uric acid levels |                   |                   |                   |                   | Per 1 mg/ml<br>increment | <i>P trend</i> |
|---------------------------------------------|------------------------|-------------------|-------------------|-------------------|-------------------|--------------------------|----------------|
|                                             | Quintile 1             | Quintile 2        | Quintile 3        | Quintile 4        | Quintile 5        |                          |                |
| <b>All-cause mortality</b>                  |                        |                   |                   |                   |                   |                          |                |
| Patients without<br>allopurinol therapy     | 1(ref)                 | 1.04 (0.82, 1.31) | 1.03 (0.82, 1.30) | 0.95 (0.75, 1.20) | 1.29 (1.03, 1.62) | 1.08 (1.02, 1.13)        | 0.005          |
| Patients without insulin<br>therapy         | 1(ref)                 | 0.98 (0.77, 1.26) | 0.92 (0.70, 1.20) | 0.95 (0.74, 1.23) | 1.22 (0.95, 1.56) | 1.08 (1.03, 1.14)        | 0.004          |
| Patients without oral<br>hypoglycemic drugs | 1(ref)                 | 1.02 (0.72, 1.44) | 0.98 (0.72, 1.33) | 0.77 (0.56, 1.05) | 1.04 (0.78, 1.38) | 1.01 (0.95, 1.07)        | 0.746          |
| <b>CVD mortality</b>                        |                        |                   |                   |                   |                   |                          |                |

|                                             |        |                   |                   |                   |                   |                   |       |
|---------------------------------------------|--------|-------------------|-------------------|-------------------|-------------------|-------------------|-------|
| Patients without<br>allopurinol therapy     | 1(ref) | 1.02 (0.69, 1.51) | 1.04 (0.72, 1.51) | 0.90 (0.65, 1.26) | 1.48 (1.07, 2.06) | 1.12 (1.04, 1.20) | 0.005 |
| Patients without insulin<br>therapy         | 1(ref) | 0.97 (0.63, 1.48) | 1.05 (0.67, 1.66) | 0.93 (0.62, 1.40) | 1.34 (0.89, 2.03) | 1.10 (1.01, 1.20) | 0.023 |
| Patients without oral<br>hypoglycemic drugs | 1(ref) | 1.06 (0.57, 1.96) | 0.91 (0.56, 1.47) | 0.69 (0.41, 1.17) | 1.10 (0.67, 1.79) | 1.03 (0.93, 1.13) | 0.601 |

---

Values are weighted hazard ratio (95% confidence interval).

Model: adjusted for age, sex, and race/ethnicity, education level, family income level, smoking status, alcohol intake, physical activity, TEI, and HEI-2015, BMI, hypertension, dyslipidemia, diabetes duration, HbA1c, allopurinol, oral hypoglycemic drugs, insulin therapy, albuminuria, eGFR, and baseline CVD, with excluding the therapy factors.

**Supplementary Table 5. Multivariable-adjusted analyses for the associations of hyperuricemia using the different definitions with all-cause and CVD mortality among diabetes from NHANES 1999-2018**

|                            | Serum uric acid levels |                         | Serum uric acid levels                    |                                           |
|----------------------------|------------------------|-------------------------|-------------------------------------------|-------------------------------------------|
|                            | Normal (n=5,801)       | Hyperuricemia (n=1,300) | Normal (n=5,001)                          | Hyperuricemia (n=2,100)                   |
| <b>Cut-off points</b>      | ≤7.0 mg/dL             | >7.0 mg/dL              | ≤7.0 mg/dL in men,<br>≤5.7 mg/dL in women | >7.0 mg/dL in men,<br>>5.7 mg/dL in women |
| <b>All-cause mortality</b> |                        |                         |                                           |                                           |
| Deaths/person years        | 1,412/48,151           | 488/9,786               | 1,204/41,696                              | 696/16,260                                |
| Model 1                    | 1(ref)                 | 1.56 (1.35, 1.80)       | 1(ref)                                    | 1.45 (1.27, 1.66)                         |
| Model 2                    | 1(ref)                 | 1.47 (1.25, 1.74)       | 1(ref)                                    | 1.38 (1.19, 1.61)                         |
| Model 3                    | 1(ref)                 | 1.29 (1.08, 1.53)       | 1(ref)                                    | 1.26 (1.08, 1.47)                         |
| <b>CVD mortality</b>       |                        |                         |                                           |                                           |
| Deaths/person years        | 481/48,151             | 193/9,786               | 412/41,696                                | 262/16,260                                |
| Model 1                    | 1(ref)                 | 1.85 (1.50, 2.28)       | 1(ref)                                    | 1.54 (1.25, 1.90)                         |
| Model 2                    | 1(ref)                 | 1.75 (1.41, 2.17)       | 1(ref)                                    | 1.48 (1.19, 1.84)                         |

|         |        |                   |        |                   |
|---------|--------|-------------------|--------|-------------------|
| Model 3 | 1(ref) | 1.49 (1.17, 1.91) | 1(ref) | 1.30 (1.01, 1.66) |
|---------|--------|-------------------|--------|-------------------|

---

Values are n or weighted hazard ratio (95% confidence interval). Hyperuricemia was defined based on supersaturation point (SUA>7.0 mg/dL) or different sexes (SUA>7.0 mg/dL in men, and >5.7 mg/dL in women).

**Model 1:** adjusted for age, sex, and race/ethnicity.

**Model 2:** model 1 + education level, family income level, smoking status, alcohol intake, physical activity, TEI, and HEI-2015.

**Model 3:** model 2 + BMI, hypertension, dyslipidemia, diabetes duration, HbA1c, allopurinol, oral hypoglycemic drugs, insulin therapy, albuminuria, eGFR, and baseline CVD.

**Supplementary Table 6. Baseline characteristics of the included studies.**

| Author, year        | Country, region | Population      | Men (%)                             | Mean age                            | Follow-up year                   | Sample size | Event                           | Confounders                                                                                                                                                                                         | Quality score |
|---------------------|-----------------|-----------------|-------------------------------------|-------------------------------------|----------------------------------|-------------|---------------------------------|-----------------------------------------------------------------------------------------------------------------------------------------------------------------------------------------------------|---------------|
| Jee 2004(1)         | Korea           | Diabetes (sub)  | 100                                 | 44.6±8.7(all)                       | 6.5±1.9(all)                     | 3200        | 549 deaths                      | age, diabetes, hypertension, hypercholesterolaemia and smoking status                                                                                                                               | 5             |
| Ioachimescu 2007(2) | America         | Type 2 diabetes | 69.16                               | 59.3±11.5                           | 4.5                              | 535         | 58 deaths                       | age, gender, waist circumference, weight, logGFR, tobacco use, history of hypertension, CHD and stroke, BMI, LDL cholesterol, HDL cholesterol, triglycerides, fibrinogen and fasting plasma glucose | 7             |
| Zoppini 2009(3)     | Italy           | Type 2 diabetes | 55.28                               | 67.3±9.7                            | 4.7                              | 2726        | 329 deaths<br>(145 CVD deaths)  | age, sex, BMI, A1C, diabetes duration, smoking, hypertension, dyslipidemia, LDL, medication use, eGFR and albuminuria                                                                               | 8             |
| Kramer 2010(4)      | America         | Type 2 diabetes | 51.4                                | 72.1 ± 9.4                          | 13.2±6.2(all)                    | 446         | 294 deaths<br>(142 CVD deaths)  | age, current smoking, BMI, alcohol intake, regular exercise, diuretic use and eGFR                                                                                                                  | 8             |
| Ong 2010(5)         | Australia       | Type 2 diabetes | 48.6                                | 64.1±11.3                           | 10.3±3.9                         | 1268        | 525 deaths<br>(271 CVD deaths)  | age, sex, Asian ethnicity, aboriginal, BMI, exercise, lipid-lowering medication use, TG, ACE inhibitor use, ACR, retinopathy, peripheral neuropathy, CHD, PAD                                       | 9             |
| Panero 2012(6)      | Italy           | Type 2 diabetes | 43.5                                | 68.8 ± 10.6                         | 13.7                             | 1509        | 1000 deaths<br>(541 CVD deaths) | age, sex, diabetes duration, hypertension, HDL-C, LDL-C, TC, BMI, smoking and HbA1c                                                                                                                 | 7             |
| Kuo, 2013(7)        | Korea           | Diabetes(sub)   | 54.7(all)                           | 49.8±16.4(all)                      | 4.6±2.6(all)                     | 29787       | NA                              | age, sex, eGFR, fasting glucose, cholesterol and history of CHD, stroke, heart failure or CKD                                                                                                       | 6             |
| Lamacchia 2017(8)   | Italy           | Type 2 diabetes | GMS: 50.4<br>FMS: 45.5<br>PMS: 59.7 | GMS: 62.0<br>FMS: 64.2<br>PMS: 59.6 | GMS:10.3<br>FMS:7.0<br>PMS: 10.8 | 2271        | 581 deaths                      | sex, age at diabetes diagnosis, smoking habits, BMI, disease duration, HbA1c, HDL-C, TC, TG, ACR, eGFR, glucose-lowering drugs, anti-hypertensive drugs, anti-dyslipidemic treatments               | 8             |

|                 |                    |                 |       |                  |              |      |                                 |                                                                                                                                                                                                                                                                                                                                                    |   |
|-----------------|--------------------|-----------------|-------|------------------|--------------|------|---------------------------------|----------------------------------------------------------------------------------------------------------------------------------------------------------------------------------------------------------------------------------------------------------------------------------------------------------------------------------------------------|---|
| Xia 2016(9)     | China              | Diabetes        | 57.6  | 59.43±10.88      | NA           | 328  | 127 deaths<br>(66 CVD deaths)   | age, gender, BMI, hypertension, CVD, hemoglobin, serum albumin, serum phosphorus, serum creatinine, HDL-C, residual renal function, CRP, HbA1c, use of allopurinol, use of ACE inhibitor or angiotensin receptor blocker                                                                                                                           | 6 |
| Sakata 2020(10) | Japan              | Diabetes (sub)  | 40.04 | 59.23±12.08(all) | over 19(all) | 312  | 42 deaths                       | age, sex, systolic blood pressure, antihypertensive medication, diabetes, TC, HDL-C, BMI, serum albumin, eGFR, electrocardiogram abnormalities, smoking habit, alcohol intake, and regular exercise                                                                                                                                                | 7 |
| Verma 2020(11)  | Multiple countries | Type 2 diabetes | 72.01 | 63.21±8.8        | 3.1          | 2333 | 194 deaths<br>(137 CVD deaths)  | age, sex, baseline BMI, HbA1c, eGFR, region, use of diuretics, anti-gout medication and HF                                                                                                                                                                                                                                                         | 8 |
| Zhu 2021(12)    | China              | Diabetes        | 45.89 | 59.96±8.66       | 5.83         | 475  | 28 deaths                       | age, gender, BMI, WHR, hypertension, dyslipidemia, smoking status and total protein intake                                                                                                                                                                                                                                                         | 8 |
| Li 2022(13)     | America            | Diabetes        | 51.95 | 59.22±0.27       | 17           | 6178 | 1515 deaths<br>(380 CVD deaths) | age, sex, and race/ethnicity, education level, family income level, smoking status, alcohol intake, physical activity, TEI, and HEI-2010, BMI, hypertension, dyslipidemia, diabetes duration, A1c, allopurinol, antihypertensive drugs, lipid-lowering drugs, oral hypoglycemic drugs, insulin therapy, albuminuria, eGFR, baseline CVD and cancer | 9 |

---

Quality score were assessed by Newcastle-Ottawa Scale.



**Supplementary Figure 1. Flow chart of participants in this study**

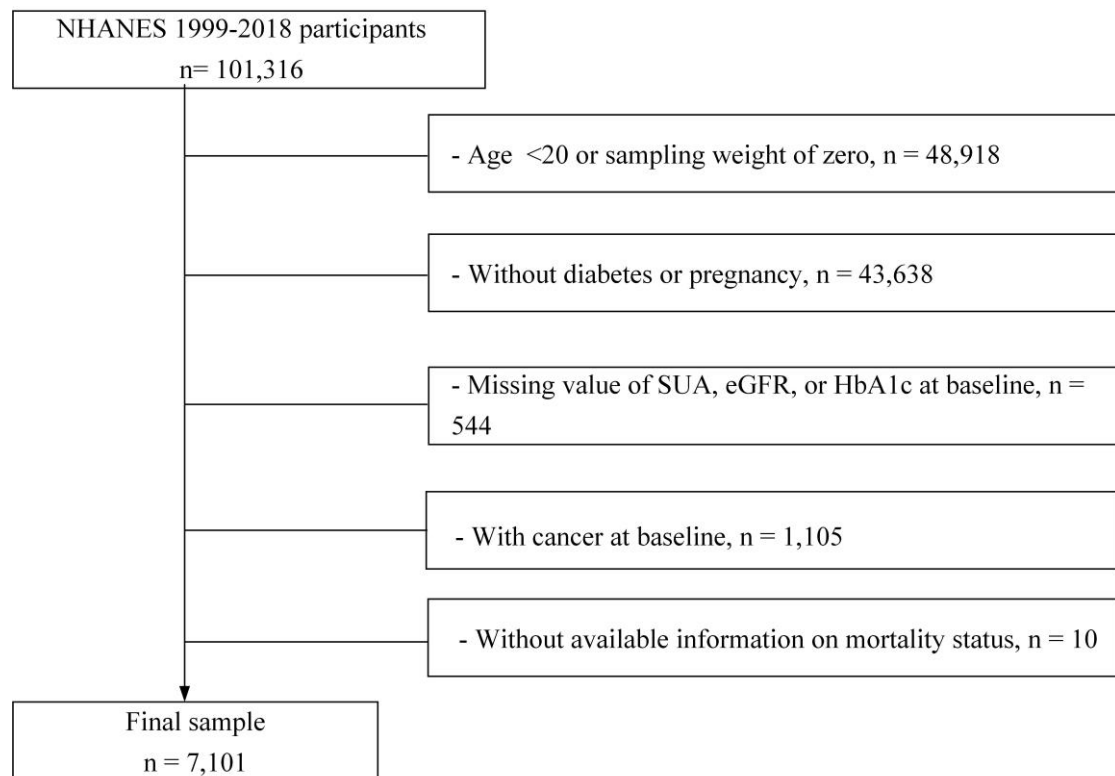

NHANES 1999-2018, National Health and Nutrition Examination Survey 1999-2018;

SUA, serum uric acid; eGFR, estimated glomerular filtration rate.

**Supplementary Figure 2. The multivariable adjusted restricted cubic splines for associations of serum uric acid levels with all-cause and CVD mortality from NHANES 1999-2018.**

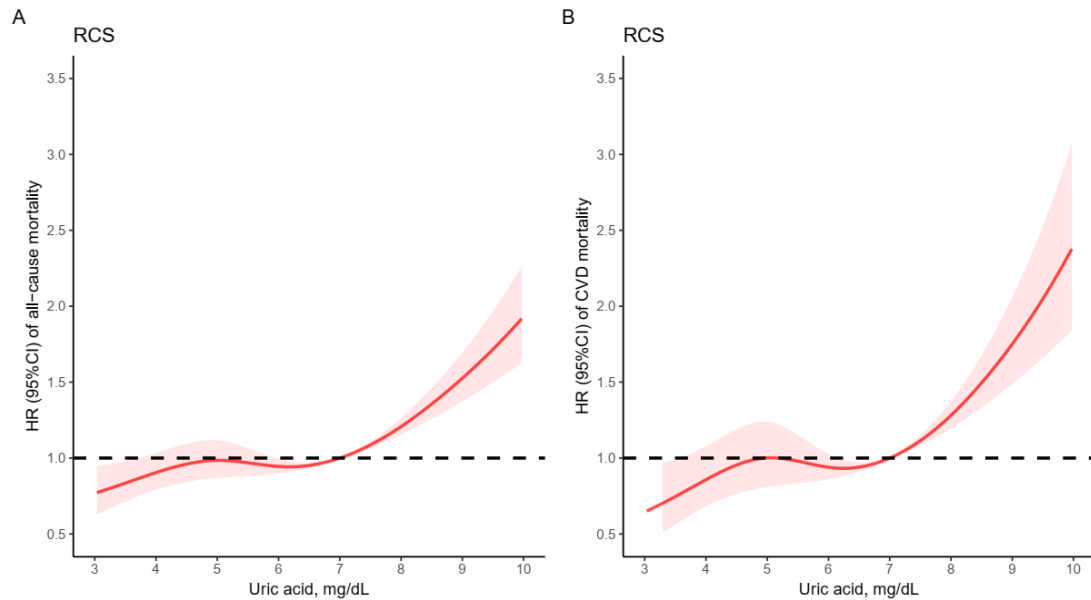

The four knots of restricted cubic splines were set at 5th, 35th, 65th, and 95th percentiles, adjusted for adjusted for age, sex, and race/ethnicity, education level, family income level, smoking status, alcohol intake, physical activity, TEI, and HEI-2015, BMI, hypertension, dyslipidemia, diabetes duration, HbA1c, allopurinol, oral hypoglycemic drugs, insulin therapy, albuminuria, eGFR, and baseline CVD.

A. Association of serum uric acid with all-cause mortality in diabetes from NHANES 1999-2018, *P* for non-linearity < 0.001.

B. Associations of serum uric acid with CVD mortality in diabetes from NHANES 1999-2018, *P* for non-linearity = 0.002.

**Supplementary Figure 3. The multivariable adjusted restricted cubic splines for associations of serum uric acid levels with all-cause and CVD mortality among men and women from NHANES 1999-2018.**

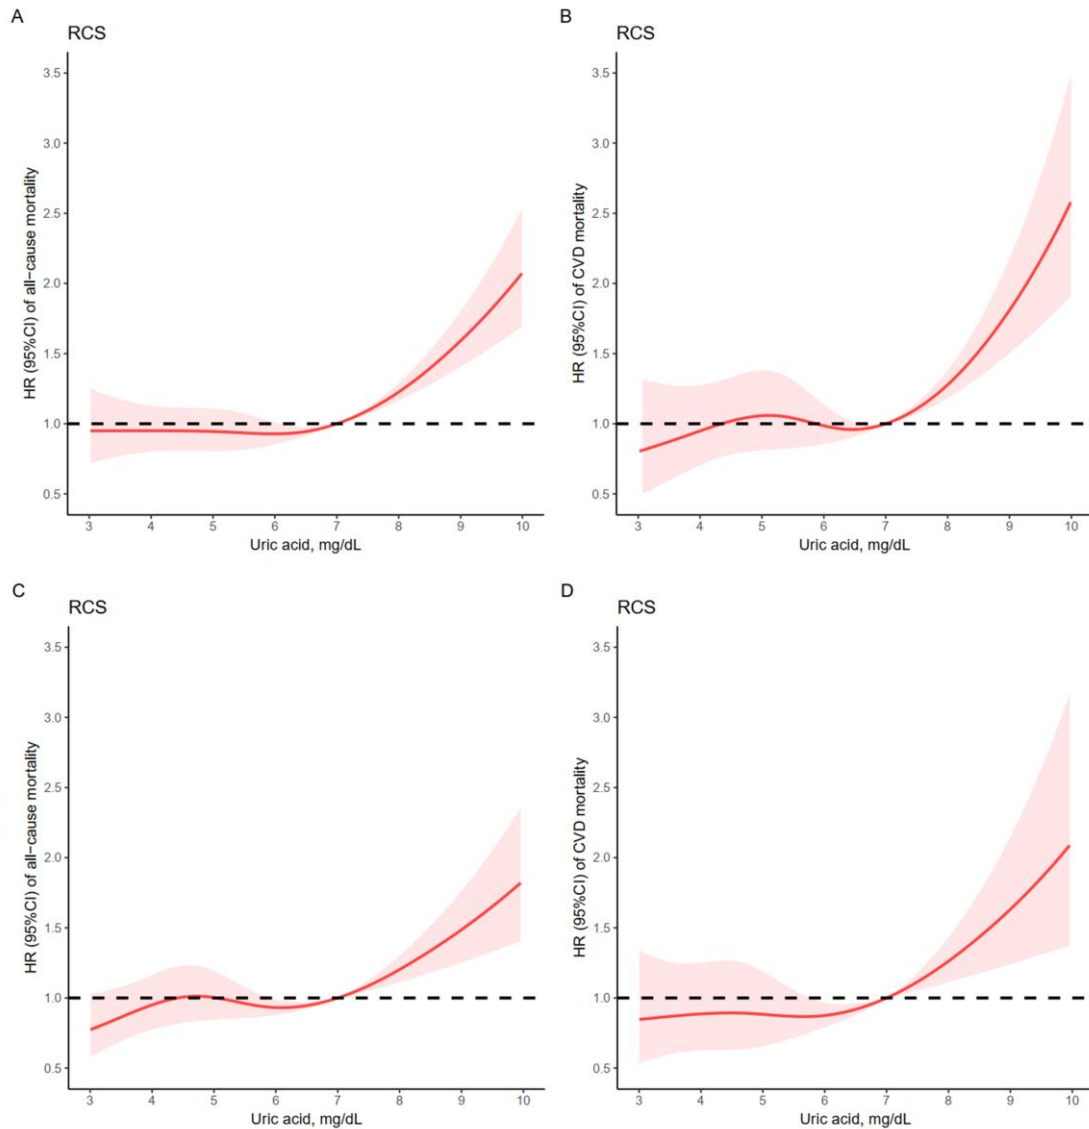

The four knots of restricted cubic splines were set at 5th, 35th, 65th, and 95th percentiles, adjusted for adjusted for age, sex, and race/ethnicity, education level, family income level, smoking status, alcohol intake, physical activity, TEI, and HEI-2015, BMI, hypertension, dyslipidemia, diabetes duration, HbA1c, allopurinol, oral hypoglycemic drugs, insulin therapy, albuminuria, eGFR, and baseline CVD.

- A. Association of serum uric acid with all-cause mortality in diabetes among men from NHANES 1999-2018,  $P$  for non-linearity  $< 0.001$ .
- B. Associations of serum uric acid with CVD mortality in diabetes among men from NHANES 1999-2018,  $P$  for non-linearity = 0.001.
- C. Association of serum uric acid with all-cause mortality in diabetes among women from NHANES 1999-2018,  $P$  for non-linearity = 0.014.
- D. Associations of serum uric acid with CVD mortality in diabetes among women from NHANES 1999-2018,  $P$  for non-linearity = 0.102.

**Supplementary Figure 4. Literature screening flow chart for the meta-analysis.**

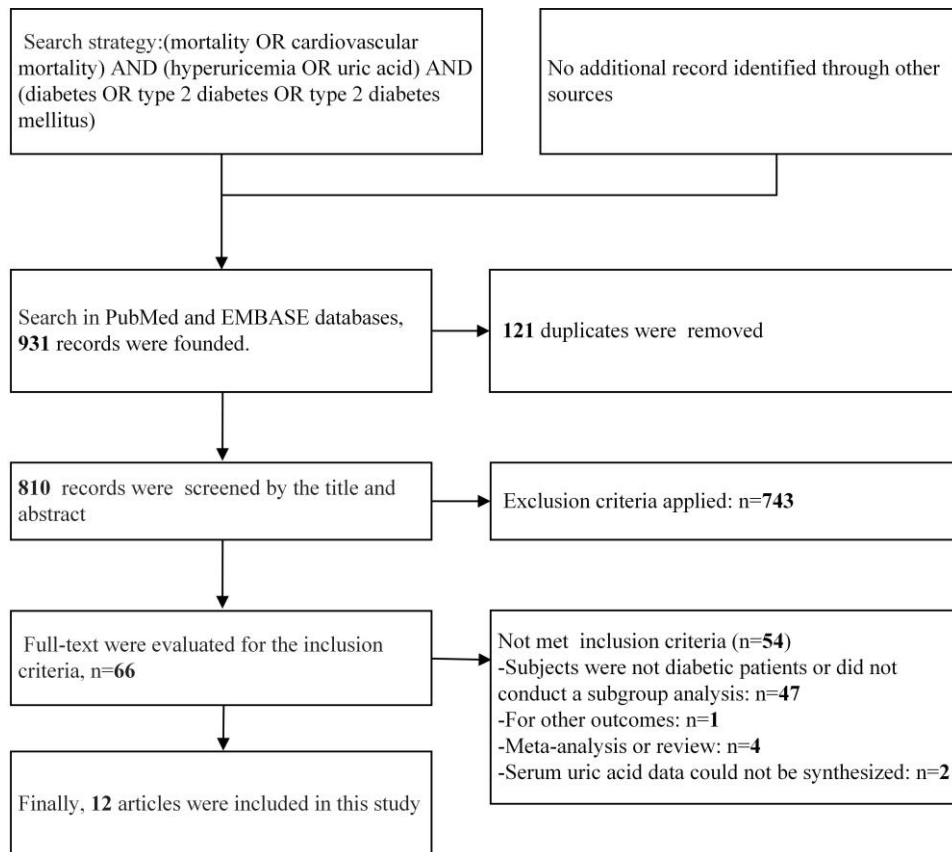

**Flow chart demonstrated processes of study search, screening, and selection.**

**Supplementary figure 5. Forest plot of subgroup meta-analysis of serum uric acid levels and all-cause and CVD mortality in patients with diabetes and type 2 diabetes.**

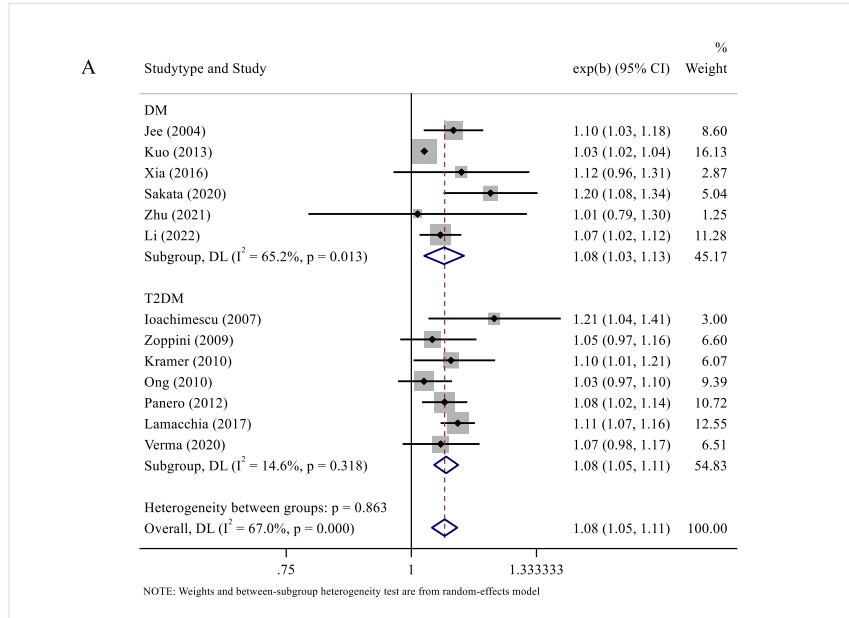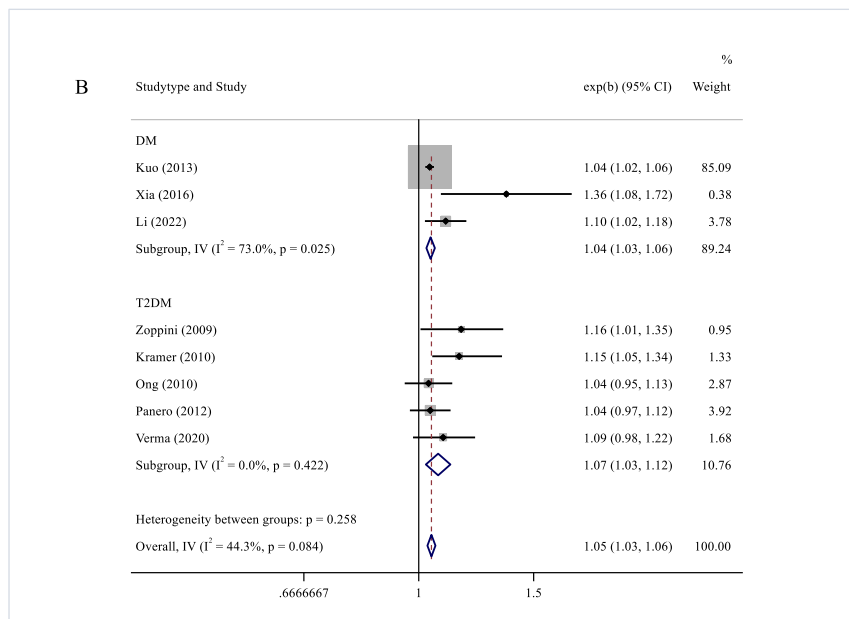

Subgroup meta-analysis among diabetes and type 2 diabetes for the associations of per 1 mg/dL increase in SUA levels with all-cause mortality (A) and CVD mortality (B).

**Supplementary Figure 6. The funnel plot, egger's plot of meta-analysis of serum uric acid levels and all-cause and CVD mortality in patients with diabetes.**

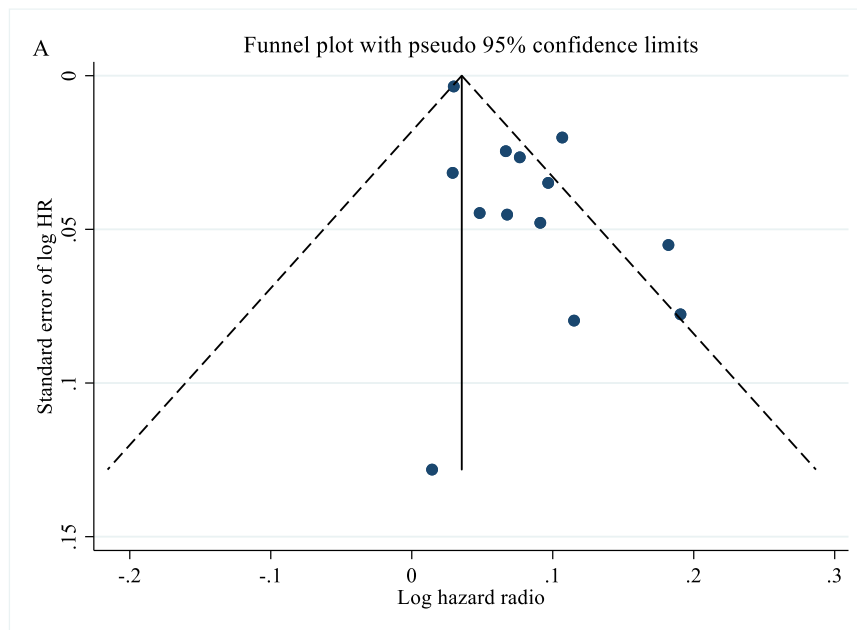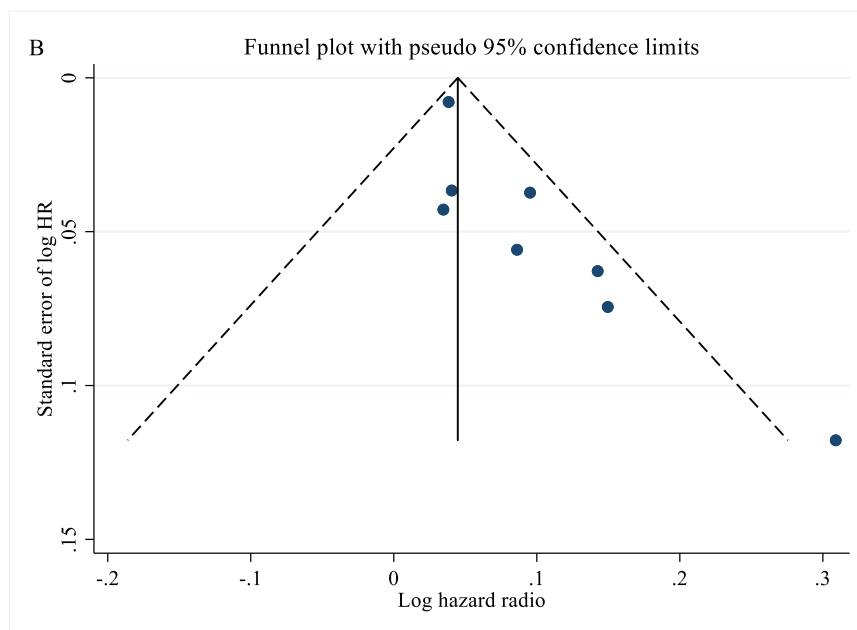

A. The funnel plot of meta-analysis of serum uric acid levels and all-cause mortality in patients with diabetes.

B. The funnel plot of meta-analysis of serum uric acid levels and CVD mortality in patients with diabetes.

**Supplementary Figure 7. The egger's plot of meta-analysis of serum uric acid levels and all-cause and CVD mortality in patients with diabetes.**

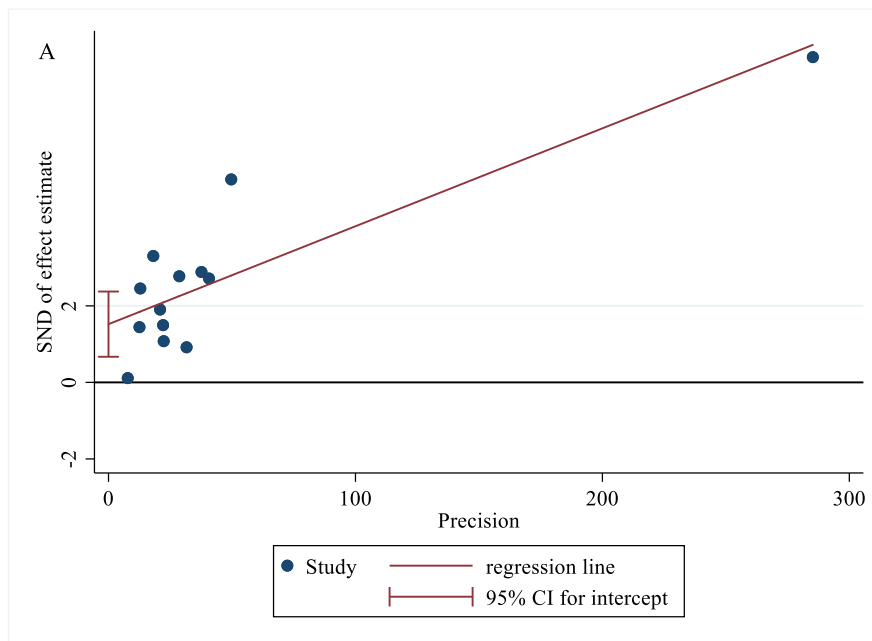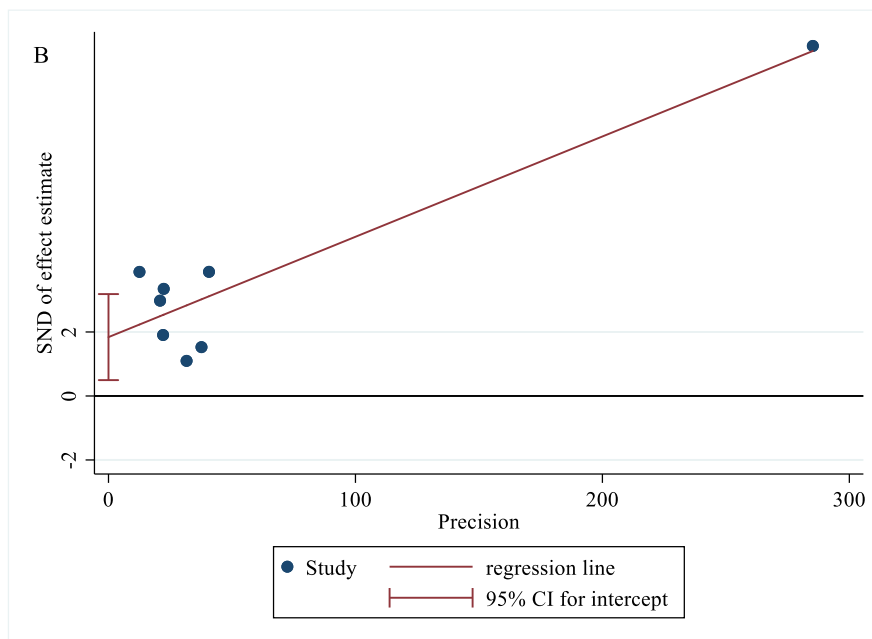

A. The egger's plot of meta-analysis of serum uric acid levels and all-cause mortality in patients with diabetes,  $P=0.002$ .

B. The egger's plot of meta-analysis of serum uric acid levels and CVD mortality in patients with diabetes,  $P=0.015$ .



**Supplementary Figure 8. Sensitive analysis of meta-analysis of serum uric acid levels and all-cause and CVD mortality in patients with diabetes**

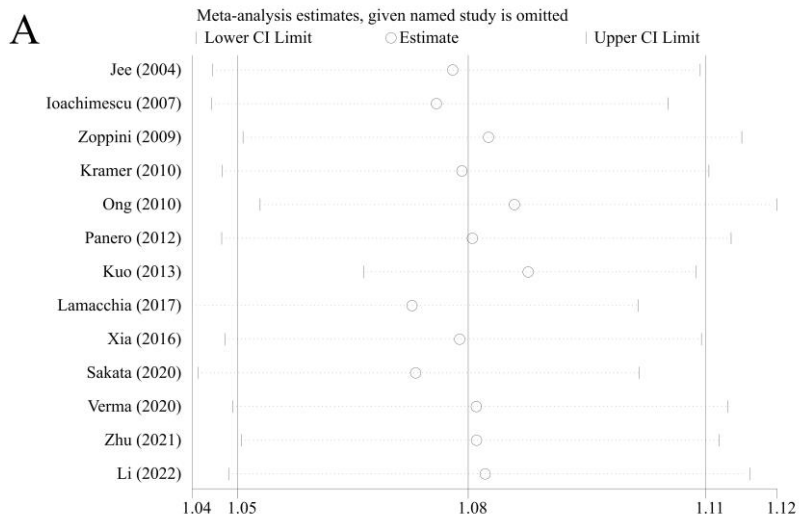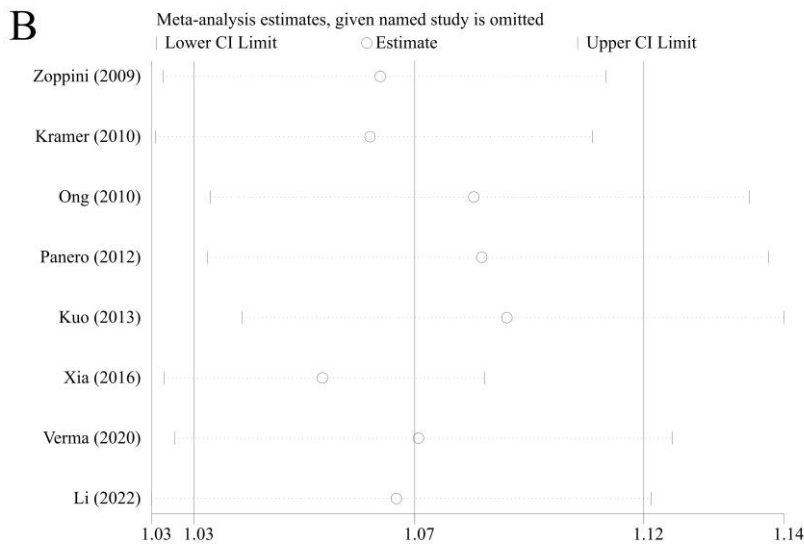

A. The dots represent the pooled results of HRs for all-cause mortality using random-effects meta-analysis when only the excluding the left listed study.

B. The dots represent the pooled results of HRs for CVD mortality using random-effects meta-analysis when only the excluding the left listed study.

**Supplementary Figure 9. Non-linear dose-response meta-analysis of serum uric acid levels with all-cause mortality in patients with diabetes**

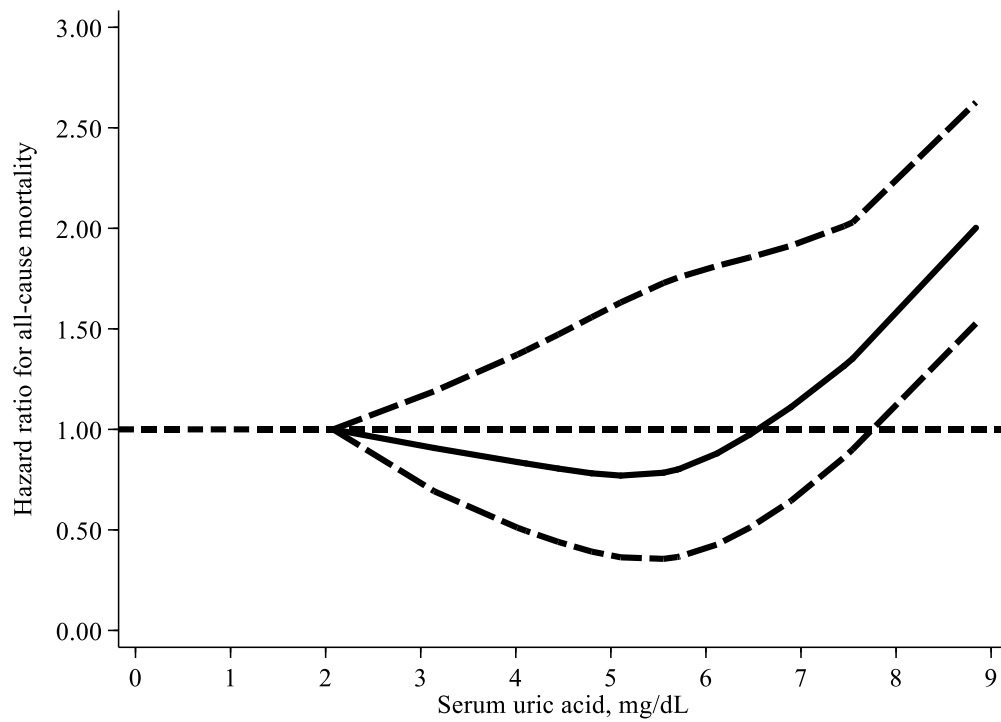

The pooled non-linear dose-response analysis of association of serum uric acid levels with all-cause mortality in patients with diabetes based on four cohort studies,  $P$  for non-linearity  $< 0.001$ .

## References

1. Jee SH, Lee SY, Kim MT. Serum uric acid and risk of death from cancer, cardiovascular disease or all causes in men. *Eur J Cardiovasc Prev Rehabil* 2004;11:185-191
2. Ioachimescu AG, Brennan DM, Hoar BM, Kashyap SR, Hoogwerf BJ. Serum uric acid, mortality and glucose control in patients with Type 2 diabetes mellitus: a PreCIS database study. *Diabet Med* 2007;24:1369-1374
3. Zoppini G, Targher G, Negri C, Stoico V, Perrone F, Muggeo M, Bonora E. Elevated serum uric acid concentrations independently predict cardiovascular mortality in type 2 diabetic patients. *Diabetes Care* 2009;32:1716-1720
4. Kramer CK, Von Mühlen D, Jassal SK, Barrett-Connor E. A prospective study of uric acid by glucose tolerance status and survival: The Rancho Bernardo Study. *J Intern Med* 2010;267:561-566
5. Ong G, Davis WA, Davis TME. Serum uric acid does not predict cardiovascular or all-cause mortality in type 2 diabetes: The Fremantle Diabetes Study. *Diabetologia* 2010;53:1288-1294
6. Panero F, Gruden G, Perotto M, Fornengo P, Barutta F, Greco E, Runzo C, Ghezzo G, Cavallo-Perin P, Bruno G. Uric acid is not an independent predictor of cardiovascular mortality in type 2 diabetes: A population-based study. *Atherosclerosis* 2012;221:183-188
7. Kuo CF, See LC, Yu KH, Chou IJ, Chiou MJ, Luo SF. Significance of serum uric acid levels on the risk of all-cause and cardiovascular mortality. *Rheumatology (Oxford)* 2013;52:127-134
8. Lamacchia O, Fontana A, Pacilli A, Copetti M, Fariello S, Garofolo M, Penno G, Trischitta V, De Cosmo S, Cignarelli M. On the non-linear association between serum uric acid levels and all-cause mortality rate in patients with type 2 diabetes mellitus. *Atherosclerosis* 2017;260:20-26
9. Xia X, Zhao C, Peng FF, Luo QM, Zhou Q, Lin ZC, Yu XQ, Huang FX. Serum uric acid predicts cardiovascular mortality in male peritoneal dialysis patients with diabetes. *Nutr Metab Cardiovasc Dis* 2016;26:20-26
10. Sakata S, Hata J, Honda T, Hirakawa Y, Oishi E, Shibata M, Yoshida D, Goto K, Kitazono T, Ninomiya T. Serum uric acid levels and cardiovascular mortality in a general Japanese population: the Hisayama Study. *Hypertens Res* 2020;43:560-568
11. Verma S, Ji Q, Bhatt DL, Mazer CD, Al-Omran M, Inzucchi SE, Wanner C, Ofstad AP, Zwiener I, George JT, Zinman B, Fitchett D. Association between uric acid levels and cardio-renal outcomes and death in patients with type 2 diabetes: A subanalysis of EMPA-REG OUTCOME. *Diabetes, Obesity and Metabolism* 2020;22:1207-1214
12. Zhu B, Zhang J, Song N, Shi Y, Fang Y, Ding X, Li Y. Distinct Prognostic Role of Serum Uric Acid Levels for Predicting All-Cause Mortality Among Chinese Adults Aged 45~75 Years With and Without Diabetes. *Front Endocrinol (Lausanne)* 2021;12:782230
13. Li B, Chen L, Hu X, Tan T, Yang J, Bao W, Rong S. Association of serum uric acid with all-cause and cardiovascular mortality in diabetes. *Diabetes care* 2022;46:1-9
